# Supplementary material
Source: Royal Society of Chemistry journal article supplement (doi:10.1039/d6tc00543h)
Supplement: d6tc00543h1.pdf [file d6tc00543h1.pdf]

# Supporting Information

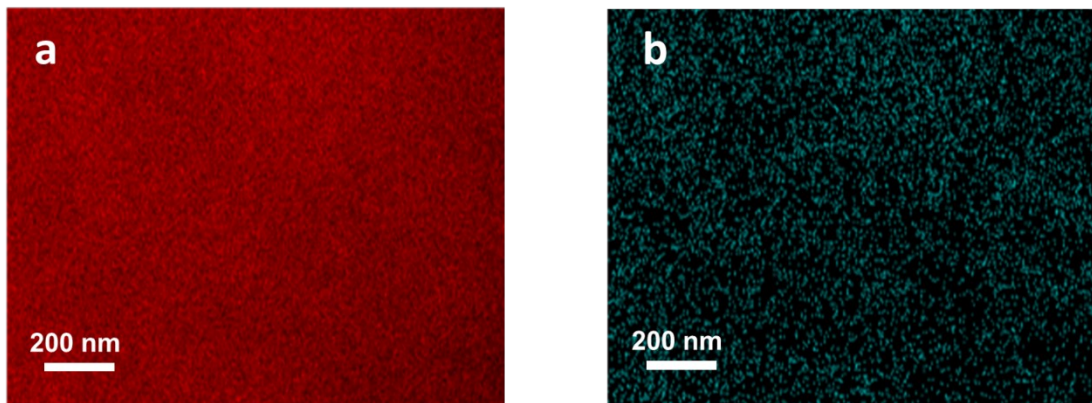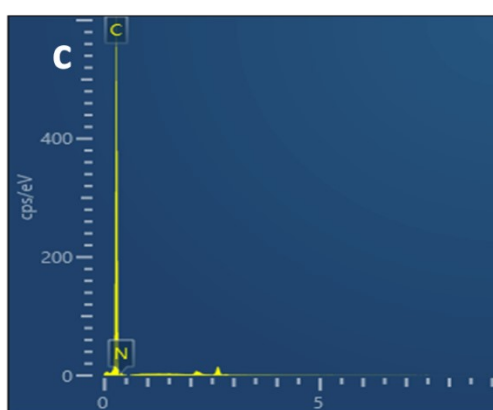

**Fig. S1** Elemental mappings of (a) C and (b) N of CNTs@PANI. (c) Average content of C and N.

**Table S1** Map Sum Spectrum.

| Element | Signal Type | Wt%  | Wt%Sigma | Atomic% |
|---------|-------------|------|----------|---------|
| C       | EDS         | 91.4 | 0.3      | 92.5    |
| N       | EDS         | 8.6  | 0.3      | 7.5     |

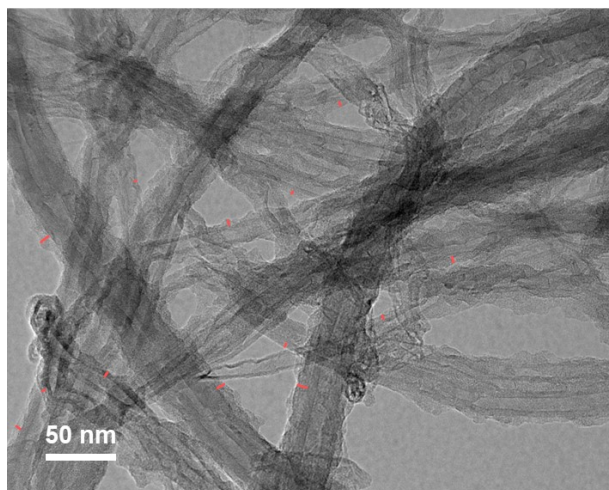

**Fig. S2** TEM images of CNTs@PANI.

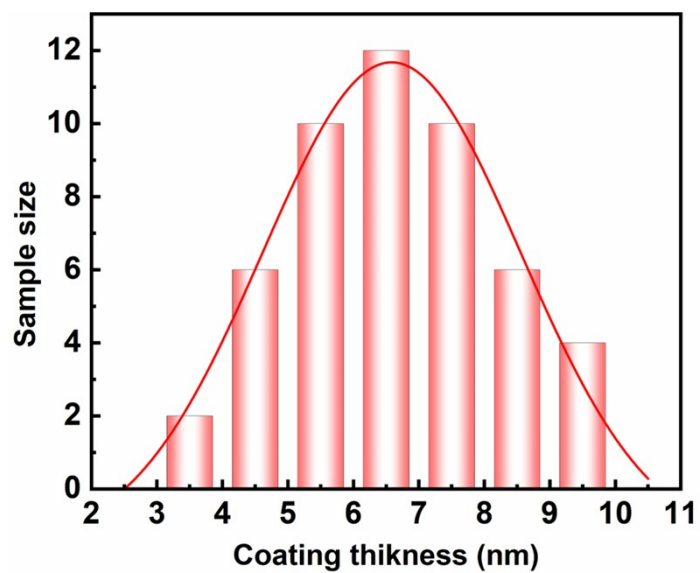

**Fig. S3** Histogram showing the distribution of PANI coating thickness measured from 50 random positions along the CNTs axis.

**Table S2** Morphological parameters of P/C-3:1 (PMM), R/C-3:1, P/C-3:1, P/C-1:1, P/C-1:3, and P/C-1:6 composites.

| Sample        | Fiber Coverage (%) | Inter-fiber spacing ( $\mu\text{m}$ ) | Agglomerate Size ( $\mu\text{m}$ ) |
|---------------|--------------------|---------------------------------------|------------------------------------|
| P/C-3:1 (PMM) | $6 \pm 2$          | $>1$                                  | 0.1-1                              |
| R/C-3:1       | $6 \pm 5$          | $>1.2$                                | -                                  |
| P/C-3:1       | $7 \pm 2$          | $>1$                                  | -                                  |
| P/C-1:1       | $22 \pm 5$         | 0.1-0.3                               | -                                  |
| P/C-1:3       | $75 \pm 8$         | $<0.05$                               | -                                  |
| P/C-1:6       | $87 \pm 7$         | $<0.05$                               | 0.1-0.4                            |

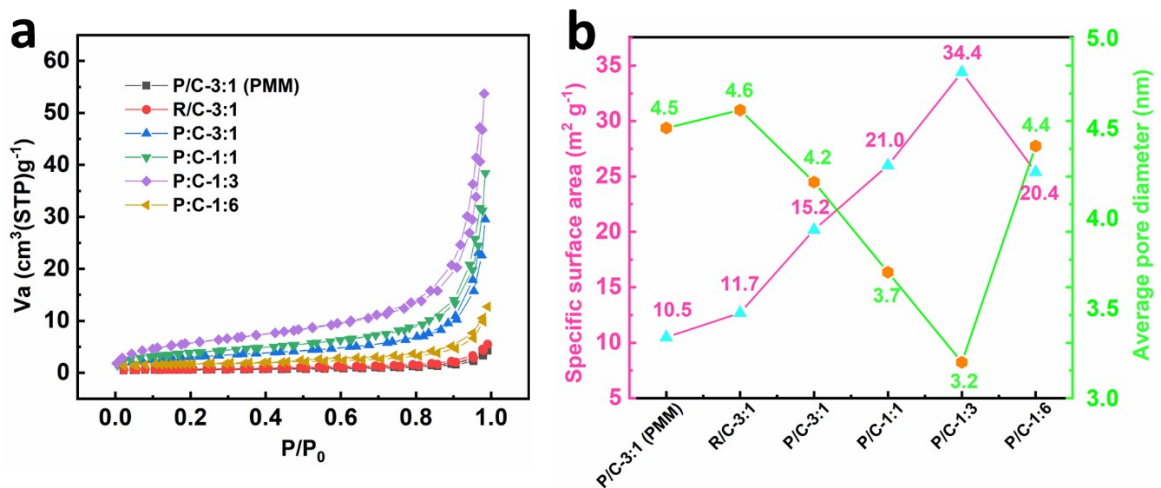

**Fig. S4** (a) Nitrogen adsorption-desorption isotherms and (b) specific surface area and average pore diameter of P/C-3:1 (PMM), R/C-3:1, P/C-3:1, P/C-1:1, P/C-1:3 and P/C-1:6.

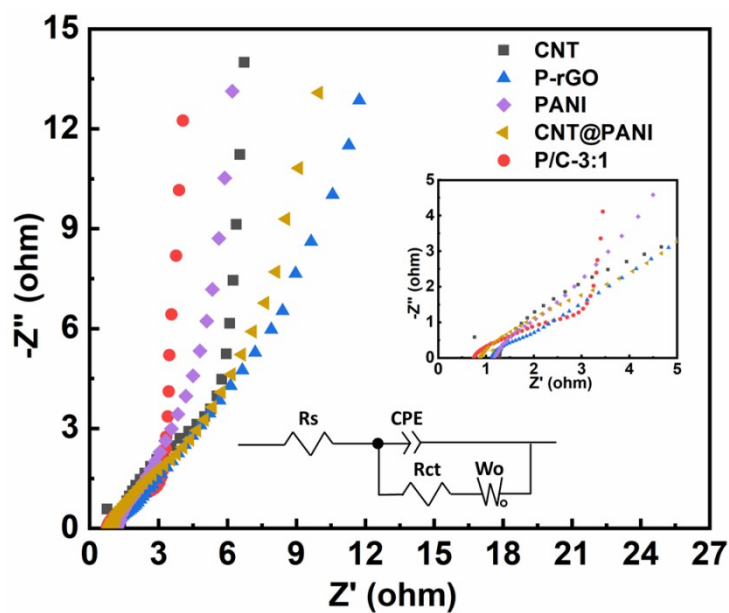

Fig. S5 Nyquist plots of CNTs, PANI, P-rGO, CNTs@PANI and P:C-3:1.

Table S3 The fitted values of  $R_s$  and  $R_{ct}$  for all samples

| Samples       | $R_s$ ( $\Omega$ ) | $R_{ct}$ ( $\Omega$ ) |
|---------------|--------------------|-----------------------|
| CNTs          | 1.34               | 8.05                  |
| P-rGO         | 1.14               | 7.57                  |
| PANI          | 1.19               | 6.23                  |
| CNTs@PANI     | 0.91               | 4.25                  |
| P:C-3:1 (PMM) | 0.97               | 7.18                  |
| R:C-3:1       | 0.98               | 6.54                  |
| P:C-3:1       | 0.77               | 3.16                  |
| P:C-1:1       | 0.67               | 3.07                  |
| P:C-1:3       | 0.42               | 2.24                  |
| P:C-1:6       | 0.68               | 2.86                  |

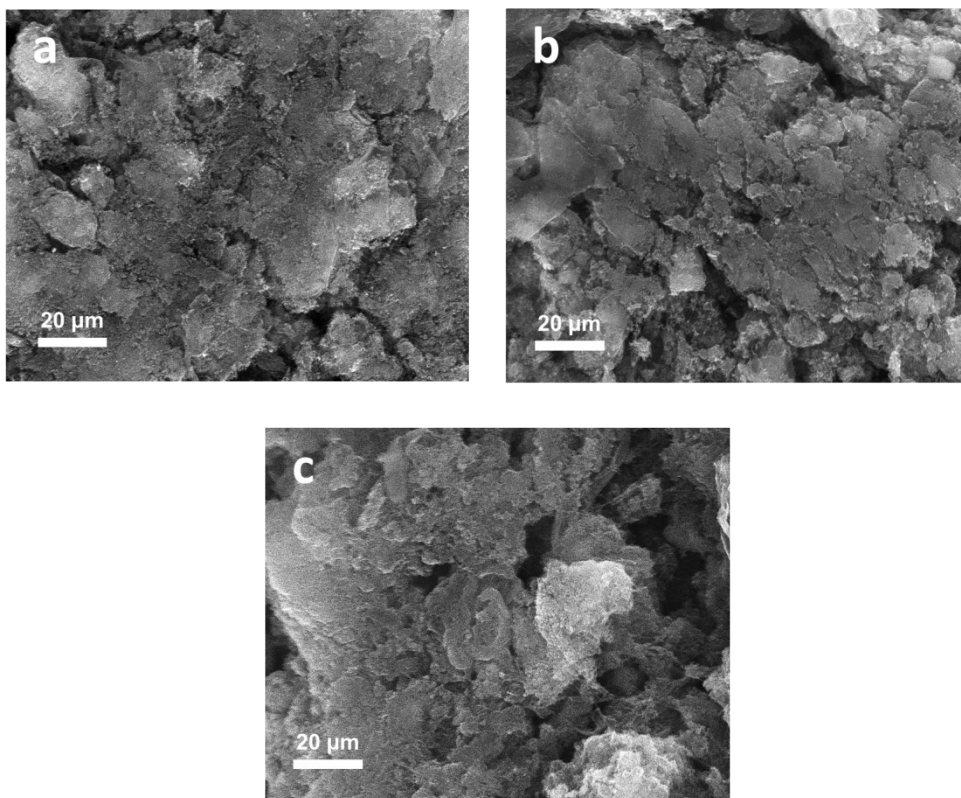

**Fig. S6** SEM images of P:C-1:3 after (a) 0, (b)5000 and (c)10000 CV cycles at  $200\text{mV s}^{-1}$ .

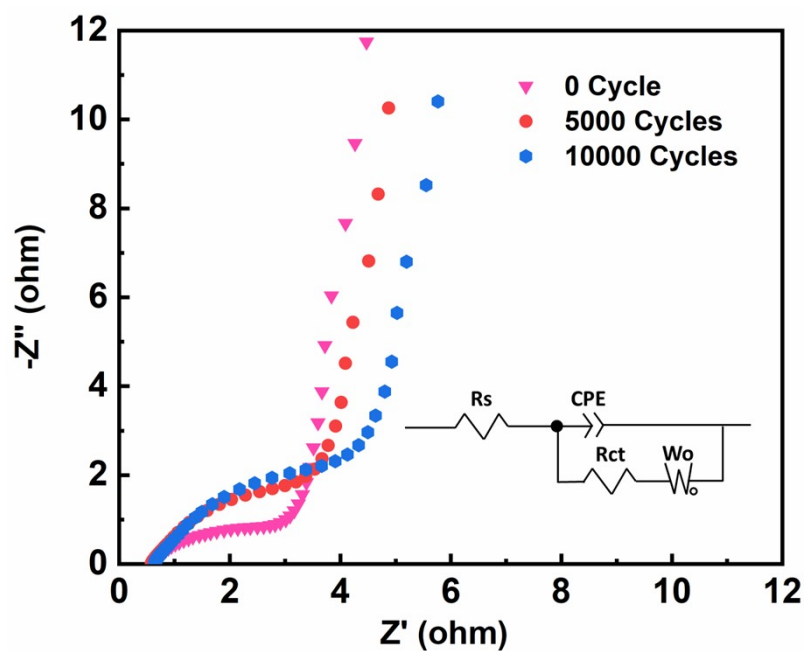

**Fig. S7** Nyquist plots of P:C-1:3 after different CV cycles at  $200\text{mV s}^{-1}$ .

**Table S4** A performance comparison of this work with other related materials reported.

| Material                 | Electrolyte                            | Specific Capacitance                              | Rate Capability                     | Cycling Stability of      | Ref.      |
|--------------------------|----------------------------------------|---------------------------------------------------|-------------------------------------|---------------------------|-----------|
| CrOOH/rGO                | 6 M KOH                                | 199.8 mF/cm <sup>2</sup> (5 mV s <sup>-1</sup> )  | 5→250 mV s <sup>-1</sup> : 29.5%    | 88% after 10,000 cycles   | 37        |
| WS <sub>2</sub> /PANI/C  | 1 M Na <sub>2</sub> SO <sub>4</sub>    | 464 F g <sup>-1</sup> (10 mV s <sup>-1</sup> )    | 0.5→8 A g <sup>-1</sup> : 37.1%     | -                         | 38        |
| mC/PANI                  | PVA/H <sub>2</sub> SO <sub>4</sub> gel | 107.8 F g <sup>-1</sup> (0.5 A g <sup>-1</sup> )  | 0.5→5 A g <sup>-1</sup> : 69.6%     | 68.1% after 2,000 cycles  | 39        |
| MWCNTs/PT B              | 1 M H <sub>2</sub> SO <sub>4</sub>     | 232.7 F g <sup>-1</sup> (1 A g <sup>-1</sup> )    | 1→20 A g <sup>-1</sup> : 69.1%      | 91.9% after 5,000 cycles  | 40        |
| Pd/MoO <sub>3</sub> /rGO | 6 M KOH                                | 291.5 F g <sup>-1</sup> (0.5 A g <sup>-1</sup> )  | 0.5→5 A g <sup>-1</sup> : 51.5%     | 88.5% after 1,000 cycles  | 41        |
| PANI/CdO                 | 3 M KOH                                | 906.8 F g <sup>-1</sup> (9.26 A g <sup>-1</sup> ) | 9.26→46.3 A g <sup>-1</sup> : 44.1% | 82% after 10,000 cycle    | 42        |
| NMr                      | 0.5 M Na <sub>2</sub> SO <sub>4</sub>  | 420 F g <sup>-1</sup> (1 A g <sup>-1</sup> )      | 1→4 A g <sup>-1</sup> : 83.3%       | >90% after 20,000 cycles  | 43        |
| P/C-1:3                  | 1M HCl                                 | 389.8 F g <sup>-1</sup> (1 A g <sup>-1</sup> )    | 1→10 A g <sup>-1</sup> : 74.1%      | 88.3% after 10,000 cycles | This work |
